# Supplementary material for: Toward a DFT-based molecular dynamics description of Co(ii) binding in sulfur-rich peptides
Source: Royal Society of Chemistry journal article supplement (doi:10.1039/b517688c), 2006-01-01
Supplement: b517688c.pdf [file b517688c.pdf]

# Toward a DFT-based molecular dynamics description of Co(II) binding in sulfur-rich peptides: Supplementary material

Riccardo Spezia, Guewen Tournois, Jeanine Tortajada,  
Thierry Cartailier and Marie-Pierre Gageot\*

February 7, 2006

Laboratoire Analyse et Modélisation pour la Biologie et l'Environnement,  
CNRS UMR-8587, Université d'Evry-Val-d'Essonne, Boulevard F. Mitter-  
rand, 91025 Evry Cedex, France. E-mail: gageot@ccr.jussieu.fr

Cartesian coordinates of the DFT/B3LYP(AE) optimized structures of [Co-(Cys-H)]<sup>+</sup> and DFT/BLYP(AE) optimized structures of [Co-(Glutathione-H)]<sup>+</sup> complexes, respectively shown in figures 3 and 4 of the paper, are provided here.

We also give the energy differences between the two [Co-(Glutathione-H)]<sup>+</sup> structures when calculations are done using different atomic basis sets with BLYP and B3LYP functionals on the optimized structures (i.e. BLYP/6-31G(d)/Wachters).

---

\*Corresponding author: (MPG) gageot@ccr.jussieu.fr

| [Co-(Cys-H)] <sup>+</sup><br>1S | x(Å)      | y(Å)      | z(Å)      |
|---------------------------------|-----------|-----------|-----------|
| C                               | -0.015355 | 1.760002  | 0.188729  |
| S                               | 1.475144  | 1.056867  | -0.666192 |
| Co                              | 0.997744  | -0.975620 | -0.042394 |
| O                               | -0.989197 | -1.164954 | -0.661926 |
| C                               | -1.576755 | -0.179381 | -0.195496 |
| O                               | -2.759512 | 0.221874  | -0.592381 |
| C                               | -0.915622 | 0.688257  | 0.866936  |
| N                               | -0.053426 | -0.239398 | 1.653508  |
| H                               | -0.602295 | 2.336085  | -0.531316 |
| H                               | 0.333157  | 2.454616  | 0.959426  |
| H                               | -1.679568 | 1.184419  | 1.474404  |
| H                               | 0.530075  | 0.287889  | 2.303625  |
| H                               | -0.615358 | -0.882981 | 2.212460  |
| H                               | -3.097370 | -0.341009 | -1.315996 |

| [Co-(Cys-H)] <sup>+</sup><br>2S | x(Å)      | y(Å)      | z(Å)      |
|---------------------------------|-----------|-----------|-----------|
| C                               | -0.051441 | 1.762996  | 0.231101  |
| S                               | 1.424489  | 1.091668  | -0.674690 |
| Co                              | 1.039939  | -0.939561 | -0.027312 |
| C                               | -0.946088 | 0.673497  | 0.878565  |
| C                               | -1.723025 | -0.076993 | -0.200233 |
| O                               | -1.023559 | -1.220013 | -0.611928 |
| N                               | -0.088416 | -0.294514 | 1.626813  |
| O                               | -2.756789 | 0.249606  | -0.696659 |
| H                               | -0.648405 | 2.364061  | -0.459392 |
| H                               | 0.320315  | 2.429895  | 1.015595  |
| H                               | -1.684304 | 1.159975  | 1.524867  |
| H                               | 0.460926  | 0.202154  | 2.329834  |
| H                               | -0.659591 | -0.974744 | 2.130718  |
| H                               | -1.474085 | -1.612028 | -1.384738 |

| [Co-(Cys-H)] <sup>+</sup><br>3S | x(Å)      | y(Å)      | z(Å)      |
|---------------------------------|-----------|-----------|-----------|
| C                               | 0.388080  | 1.541758  | -0.393322 |
| C                               | 1.349307  | 0.603143  | 0.376870  |
| N                               | 2.764561  | 0.915051  | 0.145217  |
| S                               | -1.419334 | 1.421478  | 0.011446  |
| Co                              | -1.647741 | -0.709348 | 0.022906  |
| O                               | 0.092455  | -1.511218 | 0.060915  |
| C                               | 1.184179  | -0.893657 | 0.025859  |
| O                               | 2.268109  | -1.515797 | -0.282242 |
| H                               | 2.923151  | 1.504728  | -0.668504 |
| H                               | 3.220701  | 1.338204  | 0.947841  |
| H                               | 1.128388  | 0.679218  | 1.449132  |
| H                               | 0.512663  | 1.424367  | -1.475209 |
| H                               | 0.663158  | 2.568115  | -0.135543 |
| H                               | 2.984449  | -0.802587 | -0.221676 |

| [Co-(Cys-H)] <sup>+</sup><br>4S | x(Å)      | y(Å)      | z(Å)      |
|---------------------------------|-----------|-----------|-----------|
| C                               | 0.233989  | 1.251126  | 0.378933  |
| S                               | -1.592838 | 1.381474  | 0.100605  |
| Co                              | -1.843838 | -0.741734 | -0.044807 |
| N                               | 0.159968  | -1.202211 | -0.166201 |
| C                               | 0.872301  | 0.096445  | -0.422277 |
| C                               | 2.375279  | 0.044164  | -0.114468 |
| O                               | 2.717711  | -1.065862 | 0.574665  |
| O                               | 3.130302  | 0.923684  | -0.437874 |
| H                               | 0.684245  | 2.193493  | 0.059485  |
| H                               | 0.411272  | 1.140192  | 1.454096  |
| H                               | 0.771314  | 0.316686  | -1.488622 |
| H                               | 0.513715  | -1.604997 | 0.707665  |
| H                               | 0.422004  | -1.880522 | -0.884068 |
| H                               | 3.673171  | -1.039130 | 0.767500  |

| [Co-(Cys-H)] <sup>+</sup><br>5S | x(Å)      | y(Å)      | z(Å)      |
|---------------------------------|-----------|-----------|-----------|
| C                               | 0.000000  | 0.000000  | 0.000000  |
| S                               | 0.000000  | 0.000000  | 1.855588  |
| Co                              | 2.097311  | 0.000000  | 2.241690  |
| O                               | 3.035601  | 0.011344  | 0.531576  |
| C                               | 2.480216  | 0.220784  | -0.574834 |
| O                               | 3.082772  | -0.111832 | -1.681056 |
| C                               | 1.096429  | 0.854039  | -0.726785 |
| N                               | 0.817629  | 1.130562  | -2.111145 |
| H                               | 0.019709  | -1.039742 | -0.342562 |
| H                               | -0.964976 | 0.425360  | -0.285738 |
| H                               | 1.166429  | 1.815018  | -0.200113 |
| H                               | 0.087771  | 1.822604  | -2.235980 |
| H                               | 0.626092  | 0.311784  | -2.679506 |
| H                               | 3.958514  | -0.504560 | -1.497176 |

| [Co-(Cys-H)] <sup>+</sup><br>6S | x(Å)      | y(Å)      | z(Å)      |
|---------------------------------|-----------|-----------|-----------|
| C                               | -0.840759 | -0.143777 | -0.999895 |
| C                               | -0.839751 | -0.133348 | 0.546809  |
| N                               | 0.559777  | -0.136813 | 1.087415  |
| Co                              | 1.742664  | 0.912325  | -0.213956 |
| S                               | 0.249241  | 1.166014  | -1.731318 |
| C                               | -1.539357 | -1.409362 | 1.074497  |
| O                               | -0.878298 | -2.344646 | 1.460536  |
| O                               | -2.872955 | -1.456195 | 1.035989  |
| H                               | 0.549716  | 0.219904  | 2.045373  |
| H                               | 0.815954  | -1.131357 | 1.191868  |
| H                               | -1.334182 | 0.775075  | 0.905481  |
| H                               | -1.850541 | 0.038163  | -1.376690 |
| H                               | -0.514667 | -1.116259 | -1.382902 |
| H                               | -3.291240 | -0.624548 | 0.763630  |

| [Co-(Cys-H)] <sup>+</sup><br>7S | x(Å)      | y(Å)      | z(Å)      |
|---------------------------------|-----------|-----------|-----------|
| C                               | -1.530971 | -0.239560 | -0.605813 |
| S                               | -1.469631 | -0.402443 | 1.238765  |
| Co                              | 0.594207  | -0.119012 | 1.681752  |
| O                               | 1.581699  | 0.068802  | -0.059274 |
| C                               | 0.897988  | 0.040543  | -1.341341 |
| O                               | 1.455770  | -0.468783 | -2.255984 |
| C                               | -0.480292 | 0.695070  | -1.292404 |
| N                               | -0.809024 | 1.068933  | -2.643446 |
| H                               | -1.501987 | -1.248119 | -1.031249 |
| H                               | -2.518870 | 0.181000  | -0.812511 |
| H                               | -0.393857 | 1.610314  | -0.694135 |
| H                               | -1.624912 | 1.666983  | -2.707035 |
| H                               | -0.877628 | 0.291344  | -3.292234 |
| H                               | 2.486930  | -0.265048 | -0.222911 |

| [Co-(Cys-H)] <sup>+</sup><br>1O | x(Å)      | y(Å)      | z(Å)      |
|---------------------------------|-----------|-----------|-----------|
| C                               | 0.000000  | 0.000000  | 0.000000  |
| C                               | 0.000000  | 0.000000  | 1.540208  |
| N                               | 1.413078  | 0.000000  | 2.042660  |
| Co                              | 1.777677  | -1.990025 | 1.502147  |
| O                               | 0.130327  | -2.306136 | 2.261860  |
| C                               | -0.708425 | -1.276217 | 2.085871  |
| O                               | -1.898609 | -1.299546 | 2.267008  |
| S                               | 1.111901  | -1.326172 | -0.728874 |
| H                               | 1.951830  | 0.771720  | 1.645786  |
| H                               | 1.420378  | 0.134616  | 3.055629  |
| H                               | -0.557088 | 0.878561  | 1.880772  |
| H                               | 0.329991  | 0.957420  | -0.409674 |
| H                               | -1.005231 | -0.206853 | -0.372493 |
| H                               | 2.142219  | -0.532833 | -1.095684 |

| [Co-(Cys-H)] <sup>+</sup><br>2O | x(Å)      | y(Å)      | z(Å)      |
|---------------------------------|-----------|-----------|-----------|
| C                               | -1.488088 | -0.140993 | -1.054763 |
| S                               | -1.642474 | 0.293837  | 0.785724  |
| Co                              | 0.684457  | -0.067411 | 1.498042  |
| O                               | 1.084600  | 1.208868  | 0.035686  |
| C                               | 0.882724  | 0.173505  | -0.690251 |
| O                               | 1.181127  | -0.972778 | -0.185583 |
| C                               | -0.147780 | 0.257149  | -1.801538 |
| N                               | -0.029749 | -0.620406 | -2.929406 |
| H                               | 0.335383  | -1.540344 | -2.702770 |
| H                               | 0.477033  | -0.216853 | -3.708740 |
| H                               | -0.208430 | 1.294666  | -2.135306 |
| H                               | -1.604488 | -1.222154 | -1.121206 |
| H                               | -2.328990 | 0.357809  | -1.537562 |
| H                               | -2.269973 | -0.838257 | 1.171200  |

| [Co-(Cys-H)] <sup>+</sup><br>1N | x(Å)      | y(Å)      | z(Å)      |
|---------------------------------|-----------|-----------|-----------|
| C                               | -1.580314 | -0.290156 | -0.834308 |
| S                               | -1.628029 | -0.337123 | 1.031099  |
| C                               | -0.116519 | -0.237052 | -1.373454 |
| C                               | 0.482591  | 1.119164  | -0.995643 |
| O                               | 0.987150  | 1.280347  | 0.124856  |
| Co                              | 0.812531  | -0.637046 | 1.038316  |
| N                               | 0.684172  | -1.243087 | -0.689378 |
| O                               | 0.371608  | 2.076708  | -1.888120 |
| H                               | 1.084523  | -1.965493 | -1.279187 |
| H                               | -0.144522 | -0.348262 | -2.462309 |
| H                               | -2.207237 | 0.533491  | -1.184216 |
| H                               | -2.029335 | -1.234095 | -1.148716 |
| H                               | 0.759666  | 2.910131  | -1.558157 |
| H                               | -1.726764 | 0.991872  | 1.252638  |

| [Co-(Cys-H)] <sup>+</sup><br>2N | x(Å)      | y(Å)      | z(Å)      |
|---------------------------------|-----------|-----------|-----------|
| C                               | -1.530327 | -0.510476 | -0.811056 |
| S                               | -1.551378 | -0.528481 | 1.056180  |
| Co                              | 0.876994  | -0.560047 | 1.051895  |
| O                               | 0.795793  | 1.438602  | 0.063772  |
| C                               | 0.254278  | 1.234256  | -1.210483 |
| O                               | 0.085279  | 2.132263  | -1.979358 |
| C                               | -0.110621 | -0.248599 | -1.391312 |
| N                               | 0.861207  | -1.084496 | -0.700559 |
| H                               | 1.435366  | -1.670356 | -1.300092 |
| H                               | -0.151353 | -0.431711 | -2.469984 |
| H                               | -2.276284 | 0.205753  | -1.162971 |
| H                               | -1.844490 | -1.516372 | -1.096459 |
| H                               | 1.025764  | 2.379857  | 0.176685  |
| H                               | -1.802804 | 0.783272  | 1.258495  |

| [Co-(Cys-H)] <sup>+</sup><br>3N | x(Å)      | y(Å)      | z(Å)      |
|---------------------------------|-----------|-----------|-----------|
| C                               | -1.230709 | 0.869892  | 1.043983  |
| S                               | -0.900331 | 1.663451  | 2.656781  |
| C                               | -0.004632 | 0.732203  | 0.077614  |
| C                               | 0.859194  | -0.474499 | 0.408235  |
| Co                              | 0.089884  | -0.961620 | -2.122309 |
| O                               | 1.045106  | -1.408325 | -0.404284 |
| N                               | -0.422127 | 0.576698  | -1.311471 |
| O                               | 1.398280  | -0.495046 | 1.598966  |
| H                               | -0.919500 | 1.389385  | -1.667898 |
| H                               | 0.621816  | 1.627132  | 0.207707  |
| H                               | -1.737013 | -0.091555 | 1.165793  |
| H                               | -1.938151 | 1.541489  | 0.550062  |
| H                               | 1.938124  | -1.300404 | 1.722151  |
| H                               | -0.322171 | 0.606997  | 3.259864  |

| [Co-(Gluthation-H)] <sup>+</sup><br>Structure I | x(Å)      | y(Å)      | z(Å)      |
|-------------------------------------------------|-----------|-----------|-----------|
| C                                               | 0.000000  | 0.000000  | 0.000000  |
| C                                               | 0.000000  | 0.000000  | 1.548906  |
| N                                               | 1.392088  | 0.000000  | 2.154983  |
| O                                               | 4.297909  | 1.593215  | 0.923919  |
| C                                               | 4.357161  | 2.645167  | 0.203235  |
| N                                               | 5.437565  | 2.957402  | -0.514263 |
| C                                               | 6.639737  | 2.120474  | -0.600139 |
| C                                               | 7.609162  | 2.831031  | -1.554212 |
| O                                               | 8.765805  | 2.142397  | -1.672028 |
| C                                               | 0.180004  | 1.381801  | -0.697619 |
| C                                               | 1.616269  | 1.911429  | -0.706304 |
| N                                               | 1.933741  | 2.835516  | 0.343375  |
| C                                               | 3.187402  | 3.646814  | 0.252970  |
| C                                               | 3.253087  | 4.534512  | 1.535353  |
| S                                               | 2.910370  | 3.537339  | 3.090949  |
| O                                               | 2.483419  | 1.532066  | -1.487049 |
| C                                               | -0.865803 | -1.176408 | 2.083868  |
| O                                               | -1.876541 | -1.583187 | 1.543404  |
| O                                               | -0.372371 | -1.656764 | 3.269560  |
| O                                               | 7.341931  | 3.882453  | -2.123144 |
| H                                               | 1.887243  | -0.831120 | 1.788659  |
| H                                               | 1.270532  | -0.216362 | 3.158636  |
| H                                               | -0.493969 | 0.916289  | 1.920455  |
| H                                               | 0.755099  | -0.711664 | -0.380894 |
| H                                               | -0.981074 | -0.395227 | -0.303235 |
| H                                               | -0.099873 | 1.260981  | -1.755841 |
| H                                               | -0.517315 | 2.114402  | -0.253593 |
| H                                               | 1.136487  | 3.391007  | 0.672908  |
| H                                               | 3.181174  | 4.278626  | -0.651961 |
| H                                               | 2.511012  | 5.345256  | 1.451851  |
| H                                               | 5.459645  | 3.781982  | -1.127315 |
| H                                               | 7.102668  | 1.989493  | 0.392045  |
| H                                               | 6.394110  | 1.116546  | -0.986593 |
| H                                               | 9.344542  | 2.642744  | -2.298130 |
| H                                               | -0.994367 | -2.359885 | 3.579265  |
| H                                               | 4.246797  | 4.999976  | 1.619063  |



| [Co-(Gluthation-H)] <sup>+</sup><br>Structure II | x(Å)      | y(Å)      | z(Å)      |
|--------------------------------------------------|-----------|-----------|-----------|
| C                                                | 0.000000  | 0.000000  | 0.000000  |
| C                                                | 0.000000  | 0.000000  | 1.567981  |
| N                                                | 1.406041  | 0.000000  | 2.107090  |
| S                                                | 3.772123  | -3.082929 | 2.875391  |
| C                                                | 4.502888  | -3.751196 | 1.284448  |
| C                                                | 4.109612  | -2.886080 | 0.060628  |
| C                                                | 4.335188  | -3.673733 | -1.261283 |
| O                                                | 3.393483  | -4.320697 | -1.747505 |
| C                                                | 0.679290  | -1.221496 | -0.681932 |
| C                                                | 2.183871  | -1.296919 | -0.370642 |
| N                                                | 2.638150  | -2.580599 | 0.107270  |
| O                                                | 2.931347  | -0.315322 | -0.426242 |
| C                                                | -0.647307 | -1.292248 | 2.108503  |
| O                                                | 0.060096  | -2.253811 | 2.459585  |
| O                                                | -1.975995 | -1.410195 | 2.156641  |
| N                                                | 5.585954  | -3.588375 | -1.798713 |
| C                                                | 6.059377  | -4.517930 | -2.826413 |
| C                                                | 7.093629  | -5.485666 | -2.224220 |
| O                                                | 7.507527  | -6.382940 | -3.157667 |
| O                                                | 7.496759  | -5.432163 | -1.072676 |
| H                                                | 1.991383  | 0.637990  | 1.546166  |
| H                                                | 1.410900  | 0.370932  | 3.069692  |
| H                                                | -0.558360 | 0.890792  | 1.907549  |
| H                                                | -1.044801 | 0.064799  | -0.344459 |
| H                                                | 0.503440  | 0.923408  | -0.330196 |
| H                                                | 0.164985  | -2.162799 | -0.426556 |
| H                                                | 0.580723  | -1.093004 | -1.774489 |
| H                                                | 2.151503  | -3.373112 | -0.358533 |
| H                                                | 4.640200  | -1.922760 | 0.070208  |
| H                                                | 4.133271  | -4.781236 | 1.158501  |
| H                                                | 5.596921  | -3.791713 | 1.390446  |
| H                                                | 6.316091  | -3.153935 | -1.230721 |
| H                                                | 5.193730  | -5.069216 | -3.221588 |
| H                                                | 6.521563  | -3.970337 | -3.665592 |
| H                                                | 8.179886  | -6.961097 | -2.721644 |
| H                                                | -2.427497 | -0.568599 | 1.911551  |

Energy differences between Structure I and Structure II of [Co-(Glutathion-H)]<sup>+</sup> obtained from BLYP/6-31G(d)/Wachters geometry optimization.

|                      | $\Delta E$ (kcal/mol) |
|----------------------|-----------------------|
| BLYP(AE)/3-21G       | -5.78                 |
| BLYP(AE)/6-31G       | +9.52                 |
| BLYP(AE)/6-31G(d)    | +5.15                 |
| BLYP(AE)/6-31+G(d)   | +10.99                |
| BLYP(AE)/6-311G      | +10.22                |
| BLYP(AE)/6-311G(d)   | +7.15                 |
| BLYP(AE)/6-311+G(d)  | +11.27                |
| B3LYP(AE)/3-21G      | +5.45                 |
| B3LYP(AE)/6-31G      | +8.85                 |
| B3LYP(AE)/6-31G(d)   | +8.53                 |
| B3LYP(AE)/6-31+G(d)  | +30.31                |
| B3LYP(AE)/6-311G     | +13.34                |
| B3LYP(AE)/6-311G(d)  | +15.94                |
| B3LYP(AE)/6-311+G(d) | +12.09                |
| BLYP/PW-PP           | +7.60                 |
